# Supplementary material for: Precision Medicine: Genetic Repair of Retinitis Pigmentosa in Patient-Derived Stem Cells
Source: PubMed Central journal article supplement (PMC4728485; doi:10.1038/srep19969), 2016-01-27
Supplement: srep19969-s1.pdf [file srep19969-s1.pdf]

**Supplementary Table 1. RPGR gRNAs.**

| Name           | gRNA                     | long_0 | long_1 | long_2 | short_0 | SNP                                   | SNP_count |
|----------------|--------------------------|--------|--------|--------|---------|---------------------------------------|-----------|
| MS184.RPGR.g93 | CGAAGAAGAGAATGAAAGGCNNG  | 1      | 1      | 2      | 73      | rs62636730:0.0163  rs111787313:0.0804 | 2         |
| MS184.RPGR.g91 | GAGGGGAAGTATCAGGAGACNNG  | 1      | 1      | 4      | 17      | NA                                    | 0         |
| MS184.RPGR.g95 | GAATGAAAGGCAGGATGGAGNNG  | 1      | 1      | 7      | 159     | rs62636730:0.0163                     | 1         |
| MS184.RPGR.g82 | AGGGGAAGGAGAAGAAAACNNG   | 1      | 1      | 12     | 106     | NA                                    | 0         |
| MS184.RPGR.g84 | AAACAGGAGGAACAGAGAAGNNG  | 1      | 1      | 13     | 129     | NA                                    | 0         |
| MS184.RPGR.g58 | GAAGTGAAGGGGAGGTGGANGG   | 1      | 1      | 44     | 175     | rs199896738:0.0387                    | 1         |
| MS184.RPGR.g92 | CAGCGAAGAAGAGAATGAANGG   | 1      | 2      | 6      | 128     | rs62636730:0.0163  rs111787313:0.0804 | 2         |
| MS184.RPGR.g90 | GGAAGAAGAGGGGAAGTATCNNG  | 1      | 2      | 8      | 19      | NA                                    | 0         |
| MS184.RPGR.g83 | GGGAAGGAGAAGAAAACAGGNNG  | 1      | 2      | 16     | 107     | NA                                    | 0         |
| MS184.RPGR.g94 | GAAGAGAATGAAAGGCAGGANGG  | 1      | 2      | 21     | 87      | rs62636730:0.0163                     | 1         |
| MS184.RPGR.g59 | AAGTGAAGGGGAGGTGGAANGG   | 1      | 2      | 38     | 148     | rs199896738:0.0387                    | 1         |
| MS184.RPGR.g85 | CAGGAGGAACAGAGAAGAGGNNG  | 1      | 3      | 40     | 150     | NA                                    | 0         |
| MS184.RPGR.g78 | GGAGAAGAAAGGGAAAAGGANGG  | 1      | 4      | 90     | 248     | NA                                    | 0         |
| MS184.RPGR.g86 | GAGGAACAGAGAAGAGGAGGNNG  | 1      | 5      | 38     | 438     | NA                                    | 0         |
| MS184.RPGR.g79 | GAGAAGAAAGGGAAAAGGAGNNG  | 1      | 5      | 52     | 190     | NA                                    | 0         |
| MS184.RPGR.g60 | AGTGAAGGGGAGGTGGAAGNNG   | 1      | 5      | 73     | 302     | rs199896738:0.0387                    | 1         |
| MS184.RPGR.g65 | TGGAAGGGGAGGAAGGAGAGNNG  | 1      | 5      | 82     | 417     | rs201134185:0.032                     | 1         |
| MS184.RPGR.g74 | GAGAGGAGGAAGGAGAAGAANGG  | 1      | 6      | 98     | 328     | rs200211905:0.02                      | 1         |
| MS184.RPGR.g81 | GAAAGGGAAAAGGAGGGGGANGG  | 1      | 7      | 99     | 176     | NA                                    | 0         |
| MS184.RPGR.g64 | GTGGAAGGGGAGGAAGGAGANGG  | 1      | 7      | 142    | 552     | rs201134185:0.032                     | 1         |
| MS184.RPGR.g76 | GGAAGGAGAAGAAAGGGAAAANGG | 1      | 8      | 106    | 333     | NA                                    | 0         |

## **Precision Medicine: Genetic Repair of Retinitis Pigmentosa in Patient-Derived Stem Cells**

Alexander G. Bassuk M.D, Ph.D., Andrew Zheng B.S., Yao Li M.D., Stephen H. Tsang M.D., Ph.D., Vinit B. Mahajan\* M.D., Ph.D.
